# Supplementary material for: Gambierone and Sodium Channel Specific Bioactivity Are Associated with the Extracellular Metabolite Pool of the Marine Dinoflagellate Coolia palmyrensis
Source: MDPI journal article supplement (doi:10.3390/md21040244), 2023-04-15
Supplement: s1 [file s1]

## Supplementary Materials

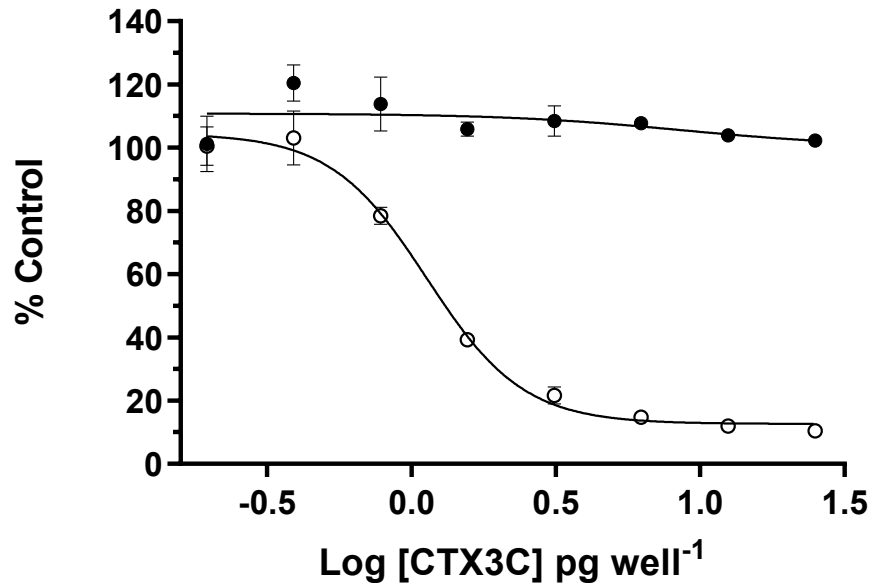

**Figure S1.** Representative CTX3C curve on N2a-MTT assay. CTX3C curves were run along-side each assay conducted on samples to qualitatively confirm the response of +OV and -OV treatments to CTX3C standard. Serial dilutions of toxin standards were dosed with (+OV; open symbols) and without (-OV; closed symbols) ouabain and veratrine. Data were normalized as a percent to their respective OV controls and each data point represents the mean  $\pm$  SD. In some cases the error bars are obscured by the symbols. At least two standard curves were performed with each round of assays for QAQC purposes.

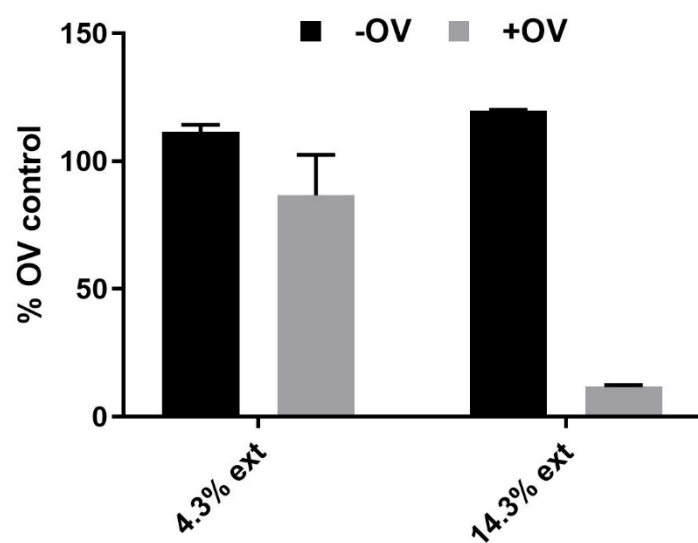

**Figure S2.** Interference of H<sub>2</sub>O partition controls on the N2a assay. Controls consisted of fresh K-media extracted with HP-20 in the same manner as experimental samples. Bars represent mean of triplicate controls  $\pm$  SE.

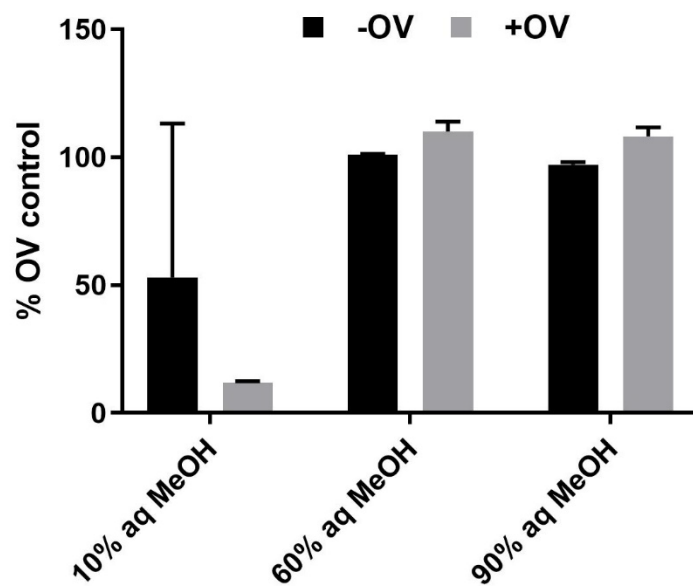

**Figure S3.** Interference of H<sub>2</sub>O partition controls on the N2a assay following clean-up via flash chromatography with C18-SPE. Controls consisted of fresh K-media extracted with HP-20 in the same manner as experimental samples. Bars represent mean of triplicate controls  $\pm$  SE.

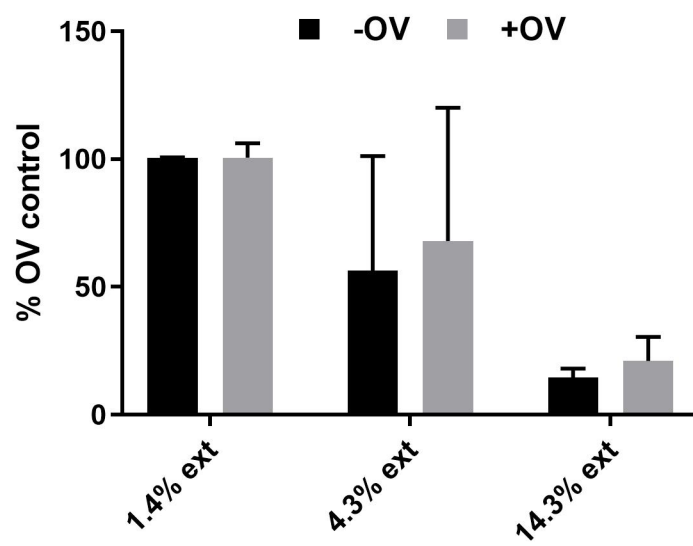

**Figure S4.** Interference of EtOAc partition controls on the N2a assay. Controls consisted of fresh K-media extracted with HP-20 in the same manner as experimental samples. Bars represent mean of triplicate controls  $\pm$  SE.

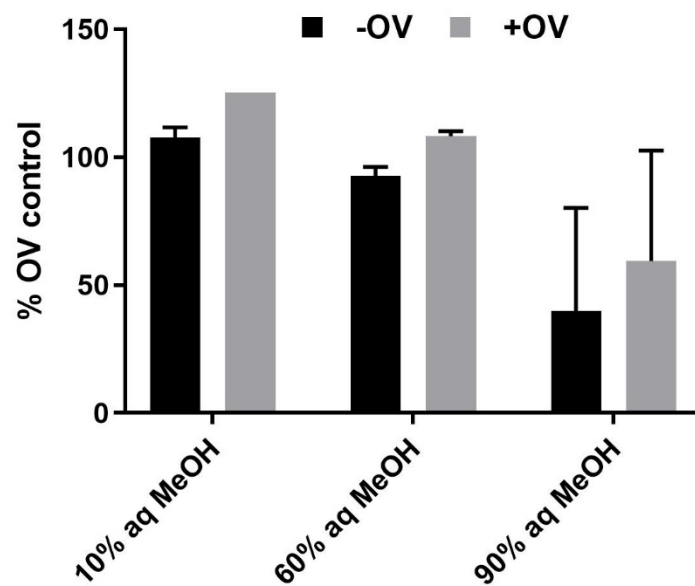

**Figure S5.** Interference of EtOAc partition controls on the N2a assay following clean-up via flash chromatography with C18-SPE. Controls consisted of fresh K-media extracted with HP-20 in the same manner as experimental samples. Bars represent mean of triplicate controls  $\pm$  SE.

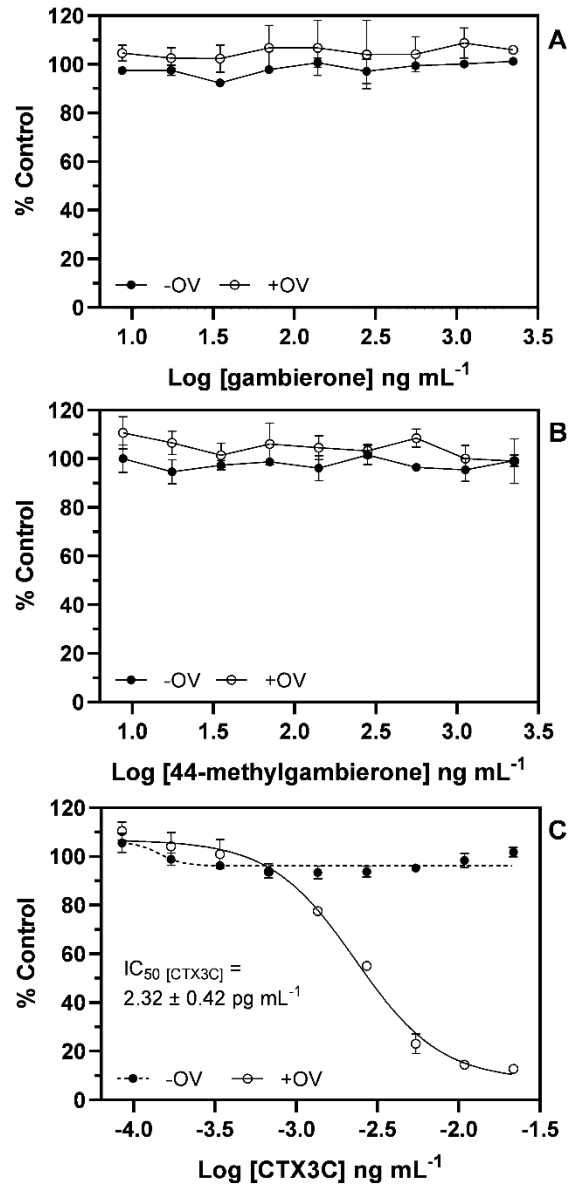

**Figure S6.** Effect of gambierone (A) and 44-Methylgambierone (B) on the N2a-MTT assay compared to a CTX3C (C). Serial dilutions of toxin standards were dosed with (+OV; open symbols) and without (-OV; closed symbols) ouabain and veratrine. Data were normalized as a percent to their respective OV controls (% control) and obtained from three independent assays, all conducted in triplicate. All concentrations were converted to the same units (log [ng mL<sup>-1</sup>]) for ease of comparison. The mean  $\pm$  SD between measurements is plotted and  $IC_{50}$  calculated for CTX3C in pg mL<sup>-1</sup> (text inset).
